# Supplementary material for: Comparative Morphology of Wax Gland Heads in Adult Dustywings (Insecta: Neuroptera: Coniopterygidae)
Source: MDPI journal article supplement (doi:10.3390/insects14070650), 2023-07-20
Supplement: s1 [file s1]

# **Comparative Morphology of Wax Gland Heads in Adult Dustywings (Insecta: Neuroptera: Coniopterygidae)**

**Min Li <sup>1</sup>, John D. Oswald <sup>2,\*</sup> and Zhiqi Liu <sup>1,\*</sup>**

<sup>1</sup> Department of Entomology, China Agricultural University, Beijing 100193, China;  
liminbetter@126.com

<sup>2</sup> Department of Entomology, Texas A&M University, College Station, TX 77843, USA

\* Correspondence: [j-oswald@tamu.edu](mailto:j-oswald@tamu.edu) (J.D.O.); [liuzhiqi@cau.edu.cn](mailto:liuzhiqi@cau.edu.cn) (Z.L.)

Table S1. Material examined: collecting data.

| Subfamily: Tribe<br>Genus (Subgenus)<br>Species              | Province: Locality      | Latitude Longitude<br>(decimal degrees) | Date       |
|--------------------------------------------------------------|-------------------------|-----------------------------------------|------------|
| <b>Aleuropteryginae: Aleuropterygini</b>                     |                         |                                         |            |
| <i>Aleuropteryx sinica</i> Liu et Yang, 2003                 | Sichuan: Panzhihua      | 25.01°N 98.48°E                         | 2019.04.03 |
| <i>Heteroconis terminalis</i> Banks, 1913                    | Hainan: Danzhou         | 19.52°N 109.58°E                        | 1974.12.07 |
| “ “                                                          | Yunnan: Puer            | 22.02°N 99.09°E                         | 2019.03.30 |
| <b>Aleuropteryginae: Coniocompsini</b>                       |                         |                                         |            |
| <i>Coniocompsa longqishana</i> Yang & Liu, 1993              | Fujian: Jiangle         | 26.28°N 117.13°E                        | 1991.10.10 |
| <b>Aleuropteryginae: Fontenelleini</b>                       |                         |                                         |            |
| <i>Cryptosceneia orientalis</i> Yang & Liu, 1993             | Guangxi: Baise          | 23.90°N 106.62°E                        | 2019.04.06 |
| “ “                                                          | Guizhou: Luodian        | 25.04°N 160.23°E                        | 1987.08.26 |
| <i>Spiloconis sexguttata</i> Enderlein, 1907                 | Gansu: Longnan          | 34.35°N 104.21°E                        | 2018.07.12 |
| <b>Coniopteryginae: Coniopterygini</b>                       |                         |                                         |            |
| <b><i>Coniopteryx</i> (<i>Coniopteryx</i>)</b>               |                         |                                         |            |
| <i>Coniopteryx aspoeki</i> Kis, 1967                         | Shandong: Jinan         | 36.40°N 117.00°E                        | 2020.10.31 |
| <i>Coniopteryx choui</i> Liu & Yang, 1998                    | Jiangsu: Yangzhou       | 32.24°N 119.26°E                        | 2020.11.02 |
| <i>Coniopteryx compressa</i> Yang & Liu, 1999                | Guangxi: Nanning        | 22.48°N 108.22°E                        | 2020.11.13 |
| <i>Coniopteryx unispinalis</i> Liu & Yang, 1994              | Guangdong:<br>Guangzhou | 23.08°N 113.14°E                        | 2019.11.10 |
| <i>Coniopteryx protrufrons</i> Yang & Liu, 1999              | Fujian: Fuzhou          | 25.15°N 118.08°E                        | 2020.11.08 |
| <i>Coniopteryx gibberosa</i> Yang & Liu, 1994                | Fujian: Fuzhou          | 25.15°N 118.08°E                        | 2020.11.08 |
| <i>Coniopteryx bispinalis</i> Liu & Yang, 1993               | Yunnan: Kunming         | 25.20°N 120.45°E                        | 2019.03.17 |
| <i>Coniopteryx praecisa</i> Yang & Liu, 1994                 | Yunnan: Puer            | 22.02°N 99.09°E                         | 2019.03.21 |
| <i>Coniopteryx alticola</i> Sziráki, 2002                    | Yunnan: Yuxi            | 23.19°N 101.16°E                        | 2019.03.19 |
| <b><i>Coniopteryx</i> (<i>Xeroconiopteryx</i>)</b>           |                         |                                         |            |
| <i>Coniopteryx qiongana</i> Liu & Yang, 2002                 | Guangdong: Huizhou      | 23.08°N 114.41°E                        | 2019.08.25 |
| <i>Coniopteryx unguigonarcuata</i> Aspöck et<br>Aspöck, 1968 | Xinjiang: Wulumuqi      | 42.45°N 86.37°E                         | 2019.08.22 |
| <i>Thecosemidalis yangi</i> Liu, 1995                        | Xinjiang: Kashi         | 38.50°N 75.47°E                         | 1979.09.01 |
| <b>Coniopteryginae: Conwentziini</b>                         |                         |                                         |            |
| <i>Conwentzia sinica</i> Yang, 1974                          | Shandong: Jinan         | 36.40°N 117.00°E                        | 2021.06.28 |
| <i>Conwentzia nietoi</i> Monserrat, 1982                     | Yunnan: Dehong          | 24.18°N 97.80°E                         | 2019.03.28 |
| <i>Conwentzia pineticola</i> Enderlein, 1905                 | Gansu: Gannan           | 33.96°N 103.55°E                        | 2017.07.13 |
| <i>Semidalis aleyrodiformis</i> Stephens, 1836               | Beijing: Haidian        | 39.53°N 116.03°E                        | 2021.08.22 |
| <i>Semidalis unicornis</i> Meinander, 1972                   | Guangdong: Huizhou      | 23.08°N 114.41°E                        | 2019.08.26 |
| <i>Semidalis tibetana</i> Zhao et al., 2021                  | Xizang: Linzhi          | 26.52°N 92.09°E                         | 2019.06.04 |
| <i>Semidalis anchoroides</i> Liu & Yang, 1993                | Xizang: Linzhi          | 26.52°N 92.09°E                         | 2019.06.02 |
| <i>Semidalis decipiens</i> Roepke, 1916                      | Yunnan: Jinghong        | 21.27°N 100.25°E                        | 2019.03.23 |
| <i>Semidalis bicornis</i> Liu & Yang, 1993                   | Sichuan: Panzhihua      | 25.01°N 98.48°E                         | 2019.04.04 |
| <i>Semidalis procurva</i> Zhao et al., 2021                  | Yunnan: Ruili           | 24.02°N 97.86°E                         | 2019.03.30 |

---

|                                               |                 |                  |            |
|-----------------------------------------------|-----------------|------------------|------------|
| <i>Semidalis daqingshana</i> Liu & Yang, 1994 | Yunnan: Kunming | 25.20°N 120.45°E | 2019.03.16 |
|-----------------------------------------------|-----------------|------------------|------------|

---
